# Supplementary material for: High-throughput genotyping of CRISPR/Cas9-mediated mutants using fluorescent PCR-capillary gel electrophoresis
Source: PubMed Central journal article supplement (PMC4620477; doi:10.1038/srep15587), 2015-10-26
Supplement: srep15587-s1.pdf [file srep15587-s1.pdf]

## High-throughput genotyping of CRISPR/Cas9-mediated mutants using fluorescent PCR-capillary gel electrophoresis

Muhammad Khairul RAMLEE, Tingdong YAN, Alice M. S. CHEUNG, Charles CHUAH, Shang LI

### Figure Legends

**Supplementary Figure S1.** Schematic of engineering of sgRNA expression cassette. (a) sgRNA expression cassette sequence (U6 promoter-sgRNA-TTT; given in grey box) were divided into 12 overlapping oligonucleotides which were pieced together via two rounds of PCR. (b) Sequences of the 12 oligonucleotides used in (a).

**Supplementary Figure S2.** Testing direct lysis conditions. (a) Crude genomic DNA extracted from H1 cells using 1x and 0.5x Direct-Lyse buffer were subjected to PCR analysis to determine the optimum direct lysis conditions. (b) Comparison between lysis efficiency of 0.5x Direct-Lyse buffer and sodium hydroxide lysis buffer in A2780/CP cells. (c) HCT116 cells were lysed using 0.5x Direct-Lyse buffer and the crude genomic DNA were subjected to PCR analysis using the primers indicated below the lanes to test the compatibility of the buffer for high throughput screening of CRISPR/Cas9-targeted clones. M: DNA ladder.

**Supplementary Figure S3.** Additional *ATRX*- and *TP53*-targeted clones genotyped via fluorescent PCR-capillary gel electrophoresis. The genotype of HCT116 cells targeted using sgATRX-E4 and sgTP53-E4.2 were determined via fluorescent PCR-capillary gel electrophoresis (a and c) and verified via Sanger sequencing (b and d). All symbols and representations are identical to those in Fig. 3.

**Supplementary Figure S4.** Fluorescent PCR-capillary gel electrophoresis technique is able to detect mutants targeted using low-efficiency sgRNA. HCT116 cells were targeted using sgATRX-E2 and individual clones were genotyped via fluorescent PCR-capillary gel electrophoresis. Two clones were predicted to harbor single-base insertion (a) and this was confirmed via Sanger sequencing (b). All symbols and representations are identical to those in Fig. 3.

**Supplementary Figure S5.** Fluorescent PCR-capillary gel electrophoresis technique is able to detect heterogeneity of cell population. An HCT116 clone targeted using sgATRX-E2 showed unexpected peak pattern (i.e. two peaks whereas ATRX is mono-allelic in HCT116 background) in fluorescent PCR-capillary gel electrophoresis assay (a) indicating presence of two population of cells in the sample. Sanger sequencing (b) and Western blot (c) analyses confirmed heterogeneity of cell population.

**Supplementary Table 1.** Genotype of CRISPR/Cas9-Mediated Gene Targeted Clones via Fluorescent Capillary Gel Electrophoresis.

**Supplementary Table 2.** List of oligonucleotides used in study.

**Supplementary Table 3.** Spacer sequence of sgRNAs.

# Supplementary Figure S1

**a**

```
TTTTACTAGTTGTACAAAAAGCAGGCTTTAAAGGAACCAATTCAGTCGACTGGATCCGGTACCAAGGTCGGGCAGGAAGAGGGCCTATTTCCCATGATTCCT
TCATATTTGCATATACGATACAAGGCTGTTAGAGAGATAATTAGAATTAATTTGACTGTAAACACAAAGATATTAGTACAAAATACGTGACGTAGAAAGTAAT
AATTTCTTGGGTAGTTTGCAGTTTAAAATTATGTTTTAAAATGGACTATCATATGCTTACCCTAACTTGAAAGTATTTTCGATTTCTTGGCTTTATATATCTT
GTGGAAGGACGAAACACC (G) NNNNNNNNNNNNNNNNNNNNGTTTTAGAGCTAGAAATAGCAAGTTAAAATAAGGCTAGTCCGTTATCAACTTGAAAAAGTG
GCACCGAGTCGGTGCTTTTTTCTAGACCCAGCTTCTTGTACAAAGTTGGCATTACTGCAGTTTT
```

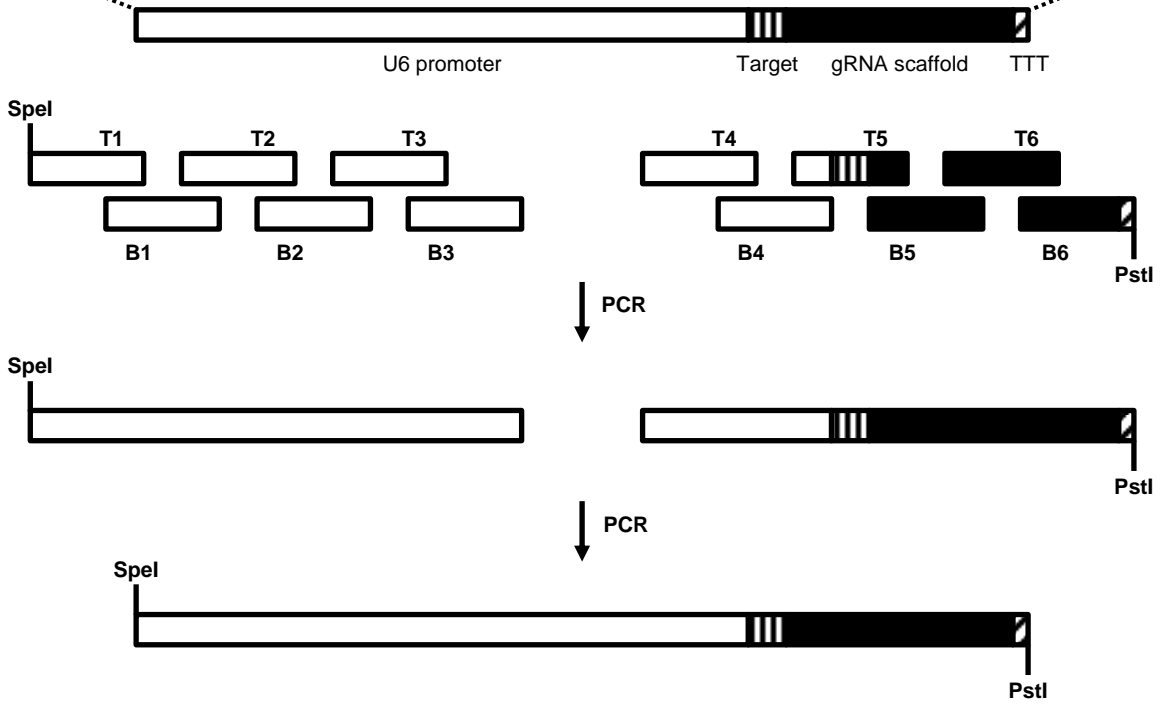

**b**

| Oligonucleotide | Sequence                                                                       |
|-----------------|--------------------------------------------------------------------------------|
| Top1            | TTTTACTAGTTGTACAAAAAGCAGGCTTTAAAGGAACCAATTCAGTCGACTGGATCCGG                    |
| Top2            | GGAAGAGGGCCTATTTCCCATGATTCCTTCATATTTGCATATACGATACAAGGCTGTTAG                   |
| Top3            | TAATTTGACTGTAAACACAAAGATATTAGTACAAAATACGTGACGTAGAAAGTAATAATT                   |
| Top4            | AGTTTTAAAATTATGTTTTAAAATGGACTATCATATGCTTACCCTAACTTGAAAGTATTT                   |
| Top5            | TATATCTTGTGAAAGGACGAAACACC(G) <sub>N<sub>20</sub></sub> GTTTTAGAGCTAGAAATAGCAA |
| Top6            | TAAGGCTAGTCCGTTATCAACTTGAAAAAGTGGCACCGAGTCGGTGCTTTTTTCTAGAC                    |
| Bottom1         | TCATGGGAAATAGGCCCTCTTCTGCCCCACCTTGGTACCGATCCAGTCGACTGAATTG                     |
| Bottom2         | TCTTTGTGTTTACAGTCAAATTAATTCTAATTATCTCTCTAACAGCCTTGATCGTATAT                    |
| Bottom3         | TTTTAAAACATAATTTAAAACCTGCAAACCTACCCAAGAAATTTACTTTCTACGTCACG                    |
| Bottom4         | TTCGTCTTTCCACAAGATATATAAAGCCAAGAAATCGAAATACTTTCAAGTTACGGTAA                    |
| Bottom5         | AGTTGATAACGGACTAGCCTTATTTAACTTGCTATTTCTAGCTCTAAAAC                             |
| Bottom6         | AAAAGCTAGCTAATGCCAACTTTGTACAAGAAAGCTGGGTCTAGAAAAAAGCACCGACT                    |

# Supplementary Figure S2

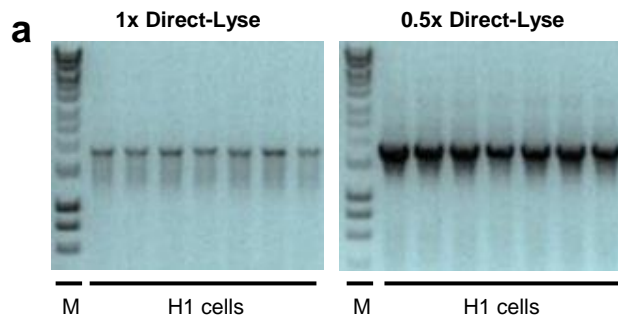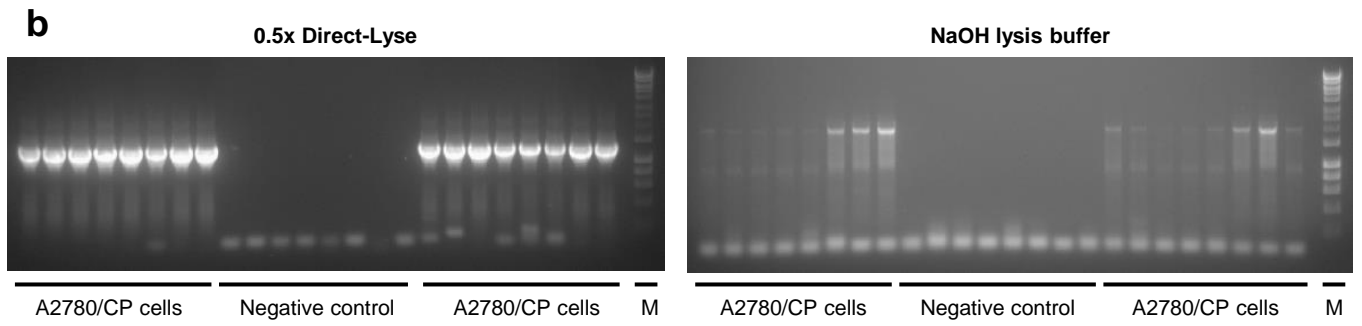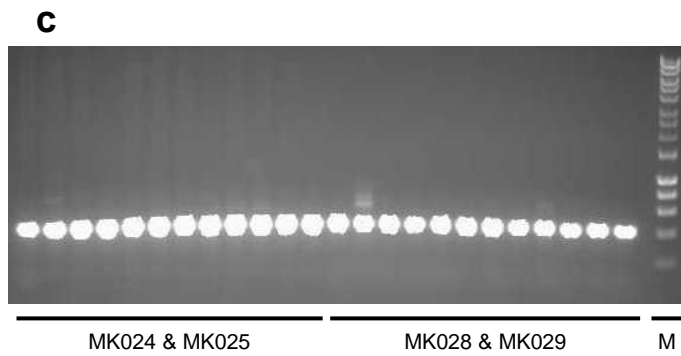

# Supplementary Figure S3

**a**

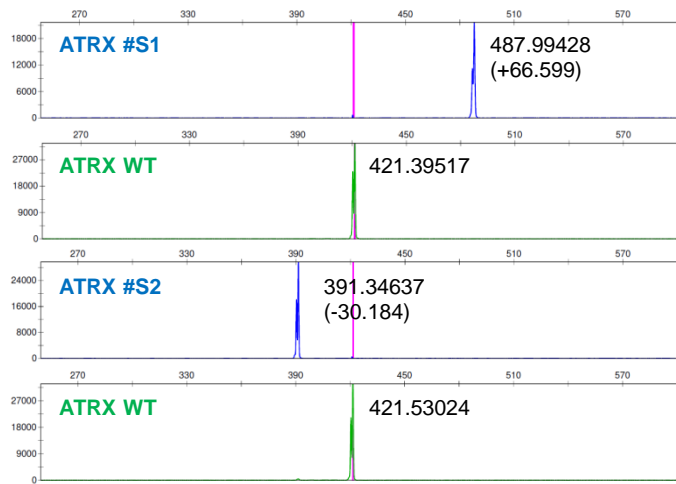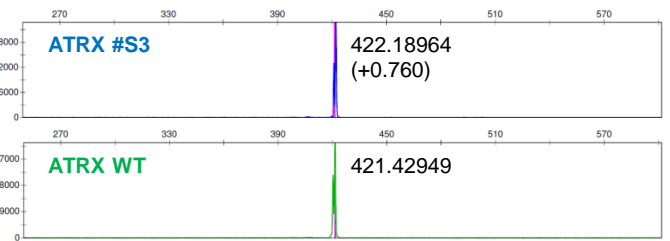

**b**

**ATRX** AACTAGTCTTTCAGAAAAATCCAAGTCTTCAGGATCGTCACGA WT  
**#S1** GCGCGCGCTGCCTTCGCCCCGTGCCCGCTCCGCCGCGCCT  
 CGCGCCGCCCGCCCCGGCTCTGACTG  
 AACTAGTCTTTCAGAAAAATCCAAGTCTTCAGGATCGTCACGA +69bp  
**#S2** AACTAGTCTC-----ACGA -30bp  
**#S3** AACTAGTCTTTCAGAAAAATCCAAGTCTTCAGGATCGTCACGA +1bp  
 C

**c**

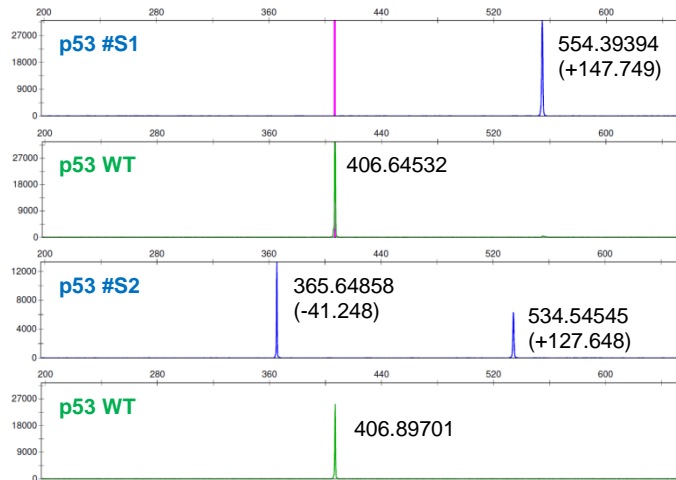

**d**

**TP53** TTCTGTCCC/29bp/GTTCCGCTGGGCTTCTTGCAATCTGG WT  
**#S1** CAATGCCAGCTTTCCTTCGCAACTCGAGTGAAGATTGGACT  
 TGCTGGCCACACAAAGAGGCATCCTGATGAATTCAGGGTC  
 AGCTTGCCGTAGGTGGCATCGCCCTCGCCCTCGCCGGACACGC  
 TGAACTGTGGCC  
 TTCTGTCCC/29bp/GTTCCGCTGGGCTTCTTGCAATCTGG +142bp  
 CAATGCCAGCTTTCCTTCGCAACTCGAGTGAAGATTGGACT  
 TGCTGGCCACACAAAGAGGCATCCTGATGAATTCAGGGTC  
 AGCTTGCCGTAGGTGGCATCGCCCTCGCCCTCGCCGGACACGC  
 TGAACTGTGGCC  
 TTCTGTCCC/29bp/GTTCCGCTGGGCTTCTTGCAATCTGG +142bp  
**#S2** CGAGCTGGTCTCGGCAAGCGGTGCCCAACATGGGGCTTGAAC  
 CCGGTCGAAGGTCGCCCGAAGCAGATTGGAGAACCGG  
 AACTACGCTGGGGAACCCGAGTACTCTTAAGCAATCCCTGT  
 GGTGAGTAAGAAG  
 TTCTGTCCC/29bp/GTTCCG-----GG -19bp; +143bp  
 AGAAC  
 TTCTGTCCC/-----/-----TGCATCTGG -47bp; +5bp

# Supplementary Figure S4

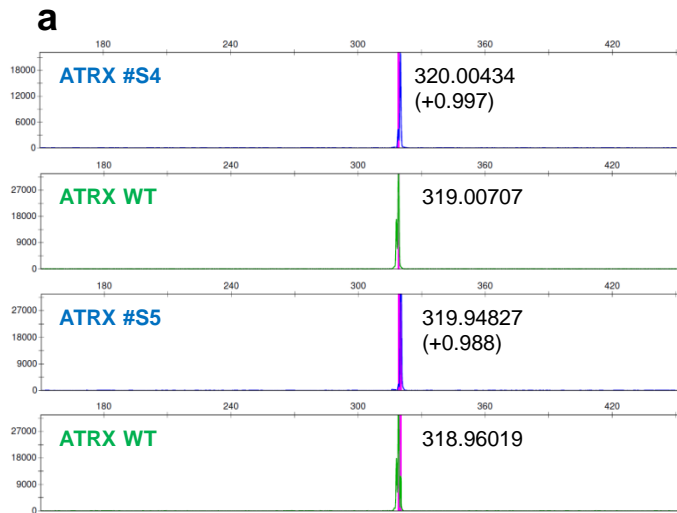

**b**

**ATRX** CTGAAGAAACAAGTTCTCCTCCACGACTTGCAATGAATCAAAA **WT**

**#S4** CTGAAGAAACAAGTTCTCCTCCACGACTTGCAATGAATCAAAA +1bp  
C

**#S5** CTGAAGAAACAAGTTCTCCTCCACGACTTGCAATGAATCAAAA +1bp  
T

# Supplementary Figure S5

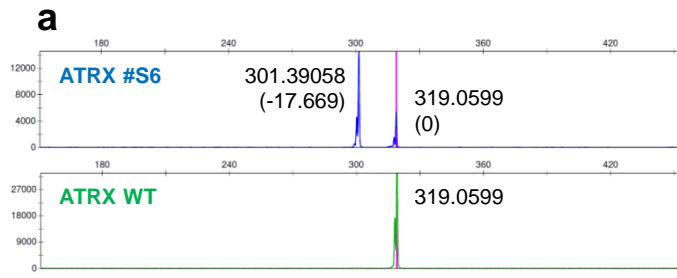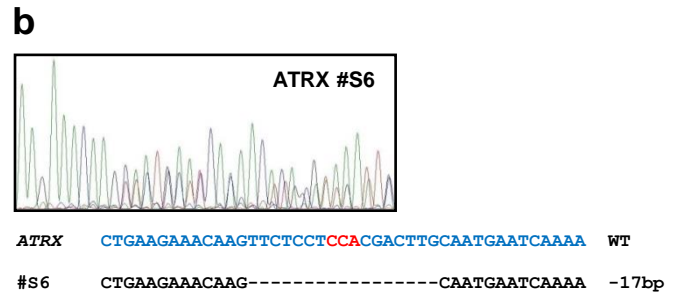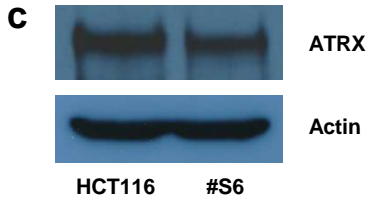





**Supplementary Table 2.** List of oligonucleotides used in study

| Oligonucleotide  | Sequence                                | Direction | Purpose                                                                      |
|------------------|-----------------------------------------|-----------|------------------------------------------------------------------------------|
| MK024            | TGGTCCTCTGACTGCTCTT                     | Forward   | For SURVEYOR assay and sequencing of sgTP53-E4.1 and sgTP53-E4.2 clones      |
| 6-FAM-/HEX-MK024 | [6-FAM]-/[HEX]-TGGTCCTCTGACTGCTCTT      | Forward   | For fluorescent PCR of sgTP53-E4.1 and sgTP53-E4.2 clones                    |
| MK025            | GGTGAAGAGGAATCCCAAAGT                   | Reverse   | For SURVEYOR assay and fluorescent PCR of sgTP53-E4.1 and sgTP53-E4.2 clones |
| MK026            | TCTTTCTACACCCACAACCTGTAA                | Forward   | For SURVEYOR assay and sequencing of sgATRX-E2 clones                        |
| 6-FAM-/HEX-MK026 | [6-FAM]-/[HEX]-TCTTTCTACACCCACAACCTGTAA | Forward   | For fluorescence PCR of sgATRX-E2 clones                                     |
| MK027            | GAAAAAAGACTAGAAGGTATAGCAC               | Reverse   | For SURVEYOR assay and fluorescent PCR of sgATRX-E2 clones                   |
| MK028            | TGCCACAGCAACCATGTAA                     | Forward   | For SURVEYOR assay and sequencing of sgATRX-E4 clones                        |
| 6-FAM-/HEX-MK028 | [6-FAM]-/[HEX]-TGCCACAGCAACCATGTAA      | Forward   | For fluorescence PCR of sgATRX-E4 clones                                     |
| MK029            | TAGTGGTTGACATGAGTTCAGAAA                | Reverse   | For SURVEYOR assay and fluorescent PCR of sgATRX-E4.1 clones                 |
| MK032            | CTGAATGAGGCCTTGGAACCT                   | Forward   | For RT-PCR of TP53 transcript                                                |
| MK033            | GGCCCTTCTGTCTTGAACAT                    | Reverse   | For RT-PCR of TP53 transcript                                                |
| MK034            | GCCAGACTTATTAGATGACCCTAA                | Forward   | For RT-PCR of ATRX transcript                                                |
| MK035            | GTTCATGGTATCCTACAATGTGTTT               | Reverse   | For RT-PCR of ATRX transcript                                                |
| SL0019           | TCACGTCATCCAGCAGAGAAATGGA               | Forward   | For RT-PCR of $\beta$ -actin transcript (control)                            |
| SL0020           | CACACGGCAGGCATACTCATCTTT                | Reverse   | For RT-PCR of $\beta$ -actin transcript (control)                            |
| TD494            | GGAGGATTCCAGCGACTC                      | Forward   | For SURVEYOR assay of sgMIR615-T1 to -T4 clones                              |
| TD597            | [6-FAM]- GGAGGATTCCAGCGACTC             | Forward   | For fluorescent PCR of sgMIR615-T1 to -T4 clones                             |
| TD598            | [HEX]- GGAGGATTCCAGCGACTC               | Forward   | For fluorescent PCR of sgMIR615-T1 to -T4 clones                             |
| TD495            | GAGAGCCGCAAGACAGG                       | Reverse   | For SURVEYOR assay and fluorescent PCR of sgMIR615-T1 to -T4 clones          |
| 001960           | (NA)                                    | Both      | For RT-PCR of MIR615-3p transcript                                           |
| 002353           | (NA)                                    | Both      | For RT-PCR of MIR615-5p transcript                                           |
| 001093           | (NA)                                    | Both      | For RT-PCR of RN46B transcript (control)                                     |

**Supplementary Table 3.** Spacer sequence of sgRNAs

| <b>sgRNA</b>   | <b>Spacer sequence</b> |
|----------------|------------------------|
| sgATRX-E2      | TTTTGATTCATTGCAAGTCG   |
| sgATRX-E4      | TCGTGACGATCCTGAAGACT   |
| sgTP53-E4.1    | GGTGCAGGGGCGCCGGTGT    |
| sgTP53-E4.2    | GGCAGCTACGGTTTCCGTCT   |
| sgMIR615-3p-T1 | CTTATTGTTCCGGTCCGAGCC  |
| sgMIR615-3p-T2 | TTATTGTTCCGGTCCGAGCCT  |
| sgMIR615-3p-T3 | ACCCTCGAGATCCGAGCACC   |
| sgMIR615-3p-T4 | CACCCTCGAGATCCGAGCAC   |
